# Supplementary material for: The Genome Sequence of the Leaf-Cutter Ant Atta cephalotes Reveals Insights into Its Obligate Symbiotic Lifestyle
Source: PLOS journal article supplement (doi:10.1371/journal.pgen.1002007), 2011-02-10
Supplement: S2 (10.1371/journal.pgen.1002007.s002) [file journal.pgen.1002007.s002]

**Table S2.** Repetitive elements identified in the *A. cephalotes* genome

| **REPEAT TYPE** | **NUMBER OF ELEMENTS** | **SUM LENGTH OF REPEATS (bp)** | **PERCENTAGE OF ASSEMBLY** |
| --- | --- | --- | --- |
| **GRAND TOTAL** | 509,994 | 80,321,000 | 25.1 |
| Non-Interspersed Repeats | 164,136 | 10,350,871 | 3.26 |
| Simple Repeats | 89,258 | 5,206,272 | 1.64 |
| Low Complexity | 74,873 | 5,143,811 | 1.62 |
| Satellite | 5 | 788 | 0.00 |
| Interspersed Repeats | 345,848 | 69,970,129 | 21.9 |
| LTR | 5625 | 2,158,785 | 0.68 |
| BEL/Pao | 664 | 676,128 | 0.21 |
| Ty1/Copia | 665 | 115,272 | 0.04 |
| Gypsy/DIRS1 | 3,799 | 1,256,340 | 0.40 |
| Retroviral | 456 | 103,587 | 0.03 |
| SINEs | 2,247 | 288,236 | 0.09 |
| Penelope | 2,231 | 876,238 | 0.28 |
| LINEs | 5,280 | 1,431,309 | 0.45 |
| L2/CR1/Rex | 1,848 | 238,445 | 0.08 |
| R1/LOA/Jockey | 938 | 175,828 | 0.06 |
| R2/R4/NeSL | 2 | 68 | 0.00 |
| RTE/Bov-B | 114 | 126,493 | 0.04 |
| DNA Transposons | 39,623 | 14,296,725 | 4.5 |
| hobo-Activator | 4,096 | 875,290 | 0.28 |
| Tc1-IS630-Pogo | 16,704 | 8,241,603 | 2.59 |
| EnSpm | 1,411 | 187,735 | 0.06 |
| MuDR-IS905 | 2 | 128 | 0.00 |
| PiggyBAC | 14 | 7058 | 0.00 |
| Tourist/Harbinger | 7 | 451 | 0.00 |
| Other | 121 | 17,176 | 0.01 |
| Novel | 290,852 | 51,794,974 | 16.3 |
| *de novo* Repeat Predictions | 1,252 | ND | ND |
| RECON | 1,243 | ND | ND |
| RepeatScout | 0 | ND | ND |
| PILER-DF | 9 | ND | ND |
