# Supplementary material for: The Genome Sequence of the Leaf-Cutter Ant Atta cephalotes Reveals Insights into Its Obligate Symbiotic Lifestyle
Source: PLOS journal article supplement (doi:10.1371/journal.pgen.1002007), 2011-02-10
Supplement: S13 (10.1371/journal.pgen.1002007.s013) [file journal.pgen.1002007.s013]

## TeXt S8: Insulin Signalling Pathway Genes

Joseph A. Moeller1,2, Garret Suen1,2, Rajee Rajakumar3, Meredith C. Naughton4, Chris R. Smith4, and Cameron R. Currie1,2,

1Department of Bacteriology, University of Wisconsin-Madison, Madison, WI 53706, United States of America

2DOE Great Lakes Bioenergy Research Center, University of Wisconsin-Madison, Madison, WI 53706, United States of America

3Department of Biology, McGill University, Montreal, Quebec H3A 1B1, Canada

4Department of Biology, Earlham College, Richmond, IN 47374, United States of America

A hallmark of the leaf-cutter ants is their exceptional polymorphic caste differentiation, whereby different sized workers are known to occupy specific tasks within the colony. The developmental processes that result in caste differentiation in ants are thought to include the interactions of gene expression, nutrition, and brood care [1]. In *Atta*, little is known regarding the underlying genetic networks that lead to the development of different castes, although it is known that this process is intrinsically linked to brood care and the amount of food fed to developing larvae [2]. To gain insight into this process in *Atta cephalotes* we annotated genes involved in the insulin receptor pathway, which are known to be involved in the nutrition and development of different castes in *Apis* [3]. Using the canonical insulin receptor pathway (TOR) described for *Drosophila* *melanogaster*, we found a total of 39 genes that includes extensive coverage of this pathway. The core signaling genes in this pathway were detected, including the growth factor receptors encoded by the *Pi3K* complex (*Acep_Pi3K21B, Acep_Pi3K59F, Acep_Pi3K68D, and Acep_Pi3K92E*). These genes activate *PDK-1* and *AKT* (*Acep_PDK1*; *Acep_AKT*), which leads to the phosphorylation of *mTor* (*Acep_TOR*), and *4EBP* (*Acep_4EBP*). This leads to the downstream activation of *EIF-4B* (*Acep_EIF4B*) and *RPS6* (*Acep_RPS6*) leading to the initiation of translation that results in overall cell growth.

Given that this pathway is highly conserved across a wide range of animal taxa, including in insects, *Atta* also likely uses this pathway for growth and development. Modulation of this pathway to induce different caste states is probably regulated by a number of mechanisms including the methyltransferases (Text S6), yellow and major royal jelly proteins (Text S9), and hexamerins (Text S15).

**References**

1. Smith CR, Anderson KE, Tillberg CV, Gadau J, Suarez AV (2008) Caste Determination in a Polymorphic Social Insect: Nutritional, Social, and Genetic Factors. The American Naturalist 172: 497.

2. Wilson EO (1980) Caste and division of labor in leaf-cutter ants (Hymenoptera: Formicidae: Atta). I. The overall pattern in Atta sexdens. Behav Ecol Sociobiol 7: 143-156.

3. Wheeler DE, Buck N, Evans JD (2006) Expression of insulin pathway genes during the period of caste determination in the honey bee, Apis mellifera. Insect Molecular Biology 15: 597.
